# Supplementary material for: Determination of Sustainable Critical Flux through a Long-Term Membrane Resistance Model
Source: MDPI journal article supplement (doi:10.3390/polym15102319), 2023-05-16
Supplement: s1 [file s1]

Supplementary data

# Determination of Sustainable Critical Flux through a Long-Term Membrane Resistance Model

Rongle Xu <sup>1,2,\*</sup>, Yaobo Fan <sup>3</sup>, Min Yang <sup>3</sup> and Jinqiu Song <sup>2</sup>

<sup>1</sup> Scientific Research Academy of Guangxi Environmental Protection, Nanning 530022, China

<sup>2</sup> School of Resources, Environment and Materials, Guangxi University, Nanning 530004, China; xurongle@gxhky.org (R.X.) and 17745056451@163.com (J.S.)

<sup>3</sup> Research Center for Eco-Environmental Sciences, Chinese Academy of Sciences, Beijing 100085, China; ybfan@rcees.ac.cn (Y.F.); yangmsunb@126.com (M.Y.)

\* Correspondence: xurongle@gxhky.org

## Model application in a large-scale A2/O-MBR municipal wastewater treatment plant b1 and b2 determination

### (1) *R* simulation regardless of CEB

Choosing an arbitrary membrane module A for *R* simulation, regardless of CEB, the simulation and measurement value was shown in Fig. S1.

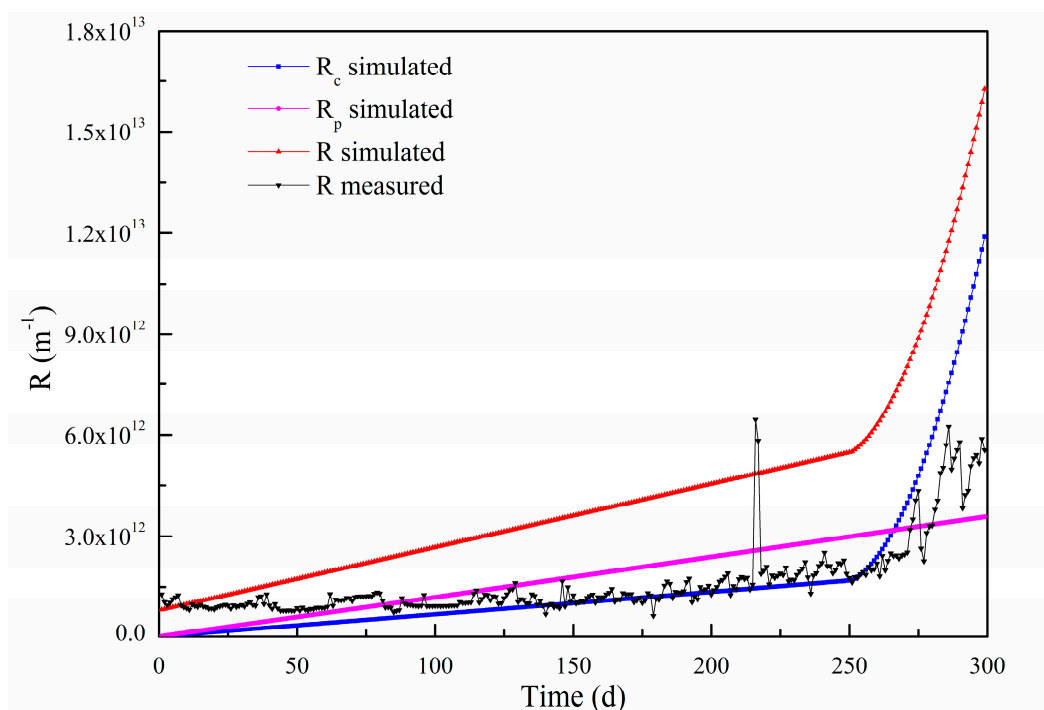

Figure S1. *R* simulation regardless of CEB.

From the Fig. S1, it was found that  $R$ -simulated was well above the  $R$ -measured. However, the  $R_c$ -simulated was consistent with  $R$ -measured, which means  $R_p$ -simulated was overestimated, and CEB had a positive effect on pore clogging remove. Therefore we considered  $b_1$ , the parameter of  $R_p$  residue after CEB, was greater than  $b_2$ , the parameter of  $R_c$  residue after CEB.

### (2) Determination of $b_1$ and $b_2$

According to the stronger inhibition of membrane pore resistance by CEB, different coefficients of  $b_1$  and  $b_2$  were set as Table 1s and simulated. The simulated results were shown in Fig. S2.

**Table S1.** Coefficients of different simulation process.

| Coefficients | 1    | 2    | 3   | 4   | 5    | 6   |
|--------------|------|------|-----|-----|------|-----|
| $b_1$        | 0.05 | 0.05 | 0.1 | 0.1 | 0.15 | 0.2 |
| $b_2$        | 0.95 | 0.9  | 0.9 | 0.8 | 0.8  | 0.7 |

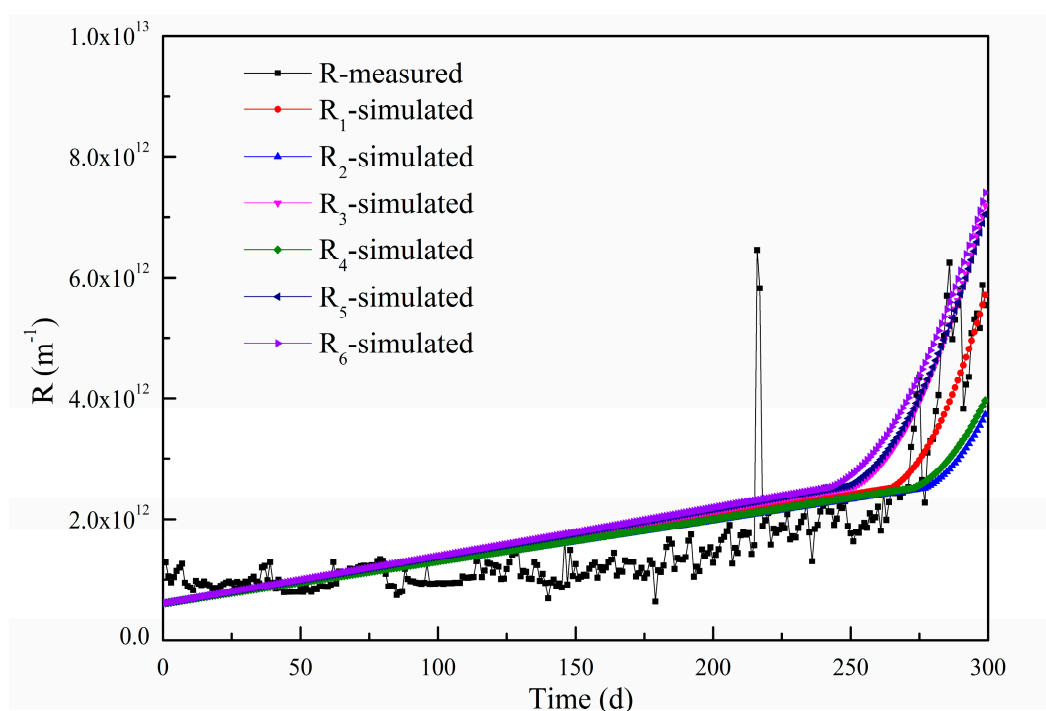

**Figure S2.** S R of simulation and measurement under different coefficients.

It can be found that  $R_1$ -simulated was very consistent with  $R$ -measured from the Fig. S2. The simulation of  $R_3$ ,  $R_5$  and  $R_6$  were higher than  $R$ -measured, and that of  $R_2$ ,  $R_4$  were lower.  $b_1=0.05$ ,  $b_2=0.95$  was more suitable for simulation.

### (3) Calibration of $b_1$ and $b_2$

In order to verify the reliability of  $b_1$  and  $b_2$ ,  $R$  of two other membrane modules B and C were simulated, and the results was shown in Fig. 3S.

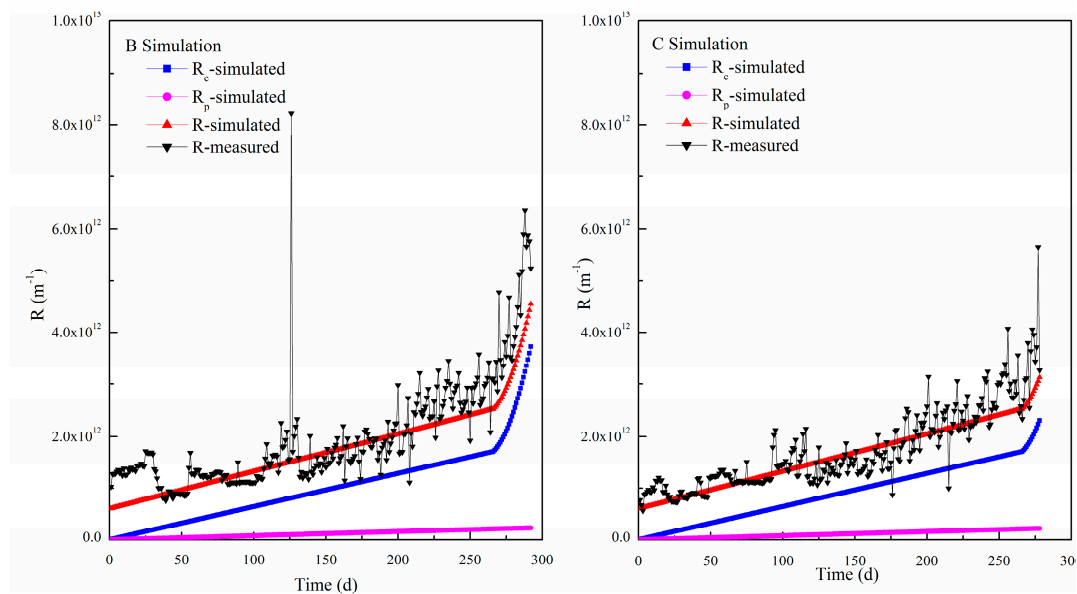

**Figure S3.** S R simulation and measurement of membrane module B and C.

The R-simulated of B and C were very consistent with R-measured, which means that  $b_1=0.05$ ,  $b_2=0.95$  were proper parameters for R simulation with CEB.
